1                   **Detection of parasite DNA in soil samples from rural Yucatán, México**

2           Liliana Villanueva-Lizama<sup>1†</sup>, Angela Cruz-Coral<sup>1†</sup>, Christian Teh-Poot<sup>1</sup>, Vladimir Cruz-Chan,  
3           Rojelio Mejia<sup>2,\*</sup>. <sup>1</sup>Laboratory of Parasitology, Regional Research Center Dr. Hideyo Noguchi,  
4           Autonomous University of Yucatán, Mérida, México. <sup>2</sup>Laboratory of Human Parasitology,  
5           National School of Tropical Medicine, Baylor College of Medicine, Houston, Texas.

6

7                   **Keywords:** parasites, environmental parasitology, soil, DNA, qPCR

8                                   **Number of figures: 1**

9                                   **Number of tables: 2**

10                                  **Supplementary materials: 0**

11

12

13

14

15

16

17   †Both authors contributed equally

18   \*Corresponding author: [rmejia@bcm.edu](mailto:rmejia@bcm.edu)

19

20

21

## 22 **ABSTRACT**

23 The soil is the primary environmental reservoir for many parasites transmitted to humans through  
24 the fecal-oral route, causing disease. Our environmental study used a high-throughput multi-  
25 parallel real-time quantitative PCR (qPCR) assay to detect parasites' DNA in soil collected from  
26 the outdoor built environments of 34 houses. The total parasite prevalence was *Acanthamoeba*  
27 *spp.* (53%), *Blastocystis spp.* (12%), *Ascaris lumbricoides* (12%), *Toxocara canis* (9%),  
28 *Ancylostoma spp.* (3%), *Trichuris trichiura* (3%), *Entamoeba histolytica* (3%) and *Giardia*  
29 *intestinalis* (3%). No DNA from *Necator americanus*, *Strongyloides stercoralis*, *Toxocara catis*,  
30 and *Cryptosporidium spp.* was detected. A total of 65% of houses were positive for at least one  
31 parasite, 15% had poly-parasites, and up to six different parasites were detected in a single  
32 sample. This is the first report of parasites-DNA detected in soil samples from a rural community  
33 in Yucatán and suggests higher rates of transmission of parasites with both a zoonotic and  
34 medical importance.

35

## 36 **SHORT COMMUNICATION**

37 Some parasites present in the soil are an important health problem in tropical and  
38 subtropical regions. These parasitic infections are caused by soil-transmitted helminths (STH):  
39 *Ascaris lumbricoides*, *Ancylostoma duodenale*, *Necator americanus*, *Strongyloides stercoralis*,  
40 *Trichuris trichiura*, *Toxocara catis*, *Toxocara canis*, and protozoan parasites such as *Blastocystis*  
41 *spp.*, *Entamoeba histolytica*, *Giardia intestinalis*, *Cryptosporidium spp.* Intestinal parasitic  
42 infections can cause diarrhea, malnutrition, anemia, impaired nutrition, development, and growth  
43 delays in children<sup>1</sup>. According to the World Health Organization (WHO), approximately 1.5 billion  
44 people (20% of the world's population) are infected with STH worldwide, and its health impact is

45 estimated at 5.2 million disability-adjusted life years (DALYs)<sup>1</sup>. Other soil-borne protists are  
46 opportunistic human pathogens. *Acanthamoeba* spp. are the most prevalent protozoa found in  
47 the environment<sup>2</sup>.

48 Parasites have relevance in environmental as well as human health. Soil contaminated  
49 with parasite eggs or cysts can favor the spread of the parasite to humans, and the rural  
50 communities have traditions that allow extensive contact with contaminated soil, such as  
51 eating/cooking outside, children playing in the yards, and using latrines. Therefore, assessing the  
52 outdoor built environment contamination can evaluate the risk of parasitic infections in rural  
53 communities. We aim to determine the presence of DNA from 12 different parasites, including  
54 helminths (*Ascaris lumbricoides*, *Ancylostoma* spp., *Necator americanus*, *Strongyloides*  
55 *stercoralis*, *Trichuris trichiura* and *Toxocara canis/cati*); the protozoa include (*Cryptosporidium*  
56 spp., *Entamoeba histolytica*, *Acanthamoeba* spp., and *Giardia intestinalis*); and heterokonts  
57 (*Blastocystis* spp.) in soil collected from a rural community in Yucatan, using a previously  
58 standardized multi-parallel real-time quantitative PCR. This study aims to incorporate the  
59 relevance of several zoonotic and human parasites and the risk of infection to populations living  
60 in endemic regions.

61 The study was performed in Sudzal, a rural Yucatán, México community with about 1700  
62 inhabitants. This community has traditional customs of latrine use and eating/cooking outside  
63 habits. Soil samples were collected from the outdoor build environment of 34 households  
64 randomly selected after obtaining consent from the owners. Samples were collected per duplicate  
65 in 50 mL Falcon tubes (containing approximately 50 mg of wet soil). A total of 68 samples were  
66 stored at -20°C until use. Samples were weighed and resuspended in 35.6% w/w sodium nitrate  
67 in water and centrifuged at 1500 x g for 5 min. Supernatants were filtered through a 3.0 µm SSWP  
68 membrane (MF-Millipore, Merck KGaA, Darmstadt, Alemania ), and the filtered materials were  
69 processed using FastDNA SPIN kit for soils (MP Biomedicals, Santa Ana, California, USA) as

70 previously described<sup>3</sup>. DNA eluent was dried on 0.2 µm filter paper (Millipore, Merck KGaA,  
71 Darmstadt, Alemania) and shipped to Baylor College of Medicine Laboratories at ambient  
72 temperatures. DNA was extracted from these filter papers using 100 µl of DEC buffer (MP  
73 Biomedicals). DNA from soil samples was analyzed by a multi-parallel quantitative polymerase  
74 chain reaction (qPCR) as described by Mejia et al. <sup>4</sup>. In addition, *Acanthamoeba* DNA was  
75 detected using a set of primers and probes previously reported<sup>5</sup>.

76 Forward Primer: CCCAGATCGTTTACCGTGAA

77 Reverse Primer: TAAATATTAATGCCCCCAACTATCC

78 Probe 5'FAM MGB: CTGCCACCGAATACATTAGCATGG

79 Samples were run on a ViiA 7 Fast Real-time PCR System (Applied Biosystems, Waltham,  
80 Massachusetts, USA), and plasmids containing the target sequences were run duplicated to  
81 create a standard curve. An exogenous internal control was used to assess the efficiency of DNA  
82 extraction, as described previously<sup>4,6</sup>.

83 Of the 34 houses tested, 22 (65%) were positive for the DNA presence of at least one  
84 parasite, and 12 (35%) were negative. Up to six different parasites were detected in a single  
85 sample, and 15% of the samples had more than one parasite detected. Over fifty percent (56%)  
86 of the samples analyzed were positive for at least one protozoon, and 18% were positive for at  
87 least one helminth parasite species. Three out of 22 (14%) samples were positive for protozoa  
88 and helminth parasites. Meanwhile, 19/22 (86%) were samples contaminated only with protozoa  
89 and 3/22 (14%) with helminth species. *Acanthamoeba* spp. had the highest DNA concentration  
90 compared to the other parasites ( $P < 0.0001$ ) (Fig 1).

91 Multi-parallel qPCR revealed that *Acanthamoeba* spp was the most frequent protozoa  
92 (18/34, 53%), and *Ascaris lumbricoides* was the most frequent helminth (4/34, 12%) detected.  
93 Positivity rates and DNA concentration range detected per parasite specie are presented in Table  
94 2: *A. lumbricoides* (12%), *T. canis* (9%), *A. duodenale*, *T. trichiura*, and *E. histolytica* (3% each).  
95 *Blastocystis* was detected in 12% of the samples. No positive samples were detected for *N.*  
96 *americanus*, *S. stercoralis*, *T. cati*, or *Cryptosporidium*.

97 To our knowledge, this is the first study reporting the molecular detection of *Acanthamoeba*  
98 spp. in soil samples from Yucatán. *Acanthamoeba* is an amphyzooid organism that is a free-living  
99 amoeba in nature and a parasitic pathogen<sup>2</sup>. *Acanthamoeba* is the causative agents of  
100 granulomatous amebic encephalitis (GAE), a potentially fatal disease of the central nervous  
101 system, amebic keratitis (AK), a painful disease of the eyes, cutaneous lesions, and sinusitis in  
102 immunocompromised patients<sup>7</sup>. More studies should be performed to identify the *Acanthamoeba*  
103 species present in the soil collected in rural Yucatan and identify the risk to human health and its  
104 participation in the ecology of the environment.

105 *T. cati*s and *T. canis* are helminthic worms that infect cats and dogs. Both animals can defecate  
106 thousands of eggs into the environment. DNA from *T. canis* was detected in the soil sampling  
107 collected in our study. Previous studies performed in fecal samples from dogs belonging to rural  
108 communities from Yucatán reported a frequency of 6% (8/130) of *T. canis*<sup>8</sup>. Sampling collection  
109 for this study includes soil collected from areas where children play, suggesting environmental  
110 contamination and risk for human toxocariasis. Our results indicate that feral and domestic dogs  
111 in Sudzal represent a significant source of environmental contamination. Other studies have  
112 reported similar frequencies of *T. canis* eggs and DNA in public spaces from poorer  
113 neighborhoods, showing an association of toxocariasis with poverty conditions<sup>9</sup>.

114 Panti-May et al.<sup>10</sup> studied the prevalence of intestinal parasites in children from rural Yucatán and  
115 reported an overall majority of 65%; six protozoa and four helminths were identified using two  
116 coproparasitological tests. *Blastocystis* spp (44.6%), *Giardia intestinalis* (26.5%), and *Entamoeba*  
117 *coli* (26.5%) were the most prevalent parasites detected. *A. lumbricoides*, *T. trichiura*, and *B.*  
118 *hominis* were also detected in children, showing the need to perform diagnostics for intestinal  
119 parasites in children and dogs living in rural Yucatán.

120 A few studies have previously reported soil contaminated with parasite eggs in rural and  
121 urban settings, with prevalence ranging from 11% to 82%, suggesting differences due to  
122 geography<sup>11</sup>. However, these studies have used microscopy techniques for egg counting and  
123 detection. Detection of parasite eggs in environmental samples such as soil or feces requires  
124 traditional techniques such as flotation/microscopy, although it is well known that microscopy's  
125 sensitivity is very low<sup>12</sup>. DNA-detection-based tools represent an alternative to parasitological  
126 methods for accurate diagnostics, monitoring worm burden before and after treatment, detecting  
127 genetic markers related to anthelmintic resistance, or monitoring drug-efficacy trials<sup>13</sup>.  
128 Quantitative polymerase chain reaction (qPCR)-based assays represent a promising alternative  
129 approach for the diagnosis of infection or epidemiological research purposes. Although more  
130 expensive than standard microscopy, molecular diagnostic is already used in many low and  
131 middle-income countries due to its sensibility and specificity, more accurate quantification,  
132 increased throughput, requiring fewer trained personnel, and offering insight into the relationship  
133 among multiple pathogens<sup>14</sup>. The method used here to identify the presence/contamination of soil  
134 with parasites is more sensitive than microscopy methods.

135 The limitations of this study include a small sample size for enrolled houses, thus not giving  
136 a broader view of the parasite prevalence in the region. Also, only two samples were collected  
137 per built environment, limiting the understanding of these parasites' locations. Only one

138 *Ancyllostoma* helminth was detected, but the primer and probes are specific to the genus, and  
139 unclear if this is an animal or human pathogen.

140 Finally, our findings suggest soil contamination is present in the outdoor built environment of  
141 households in rural Yucatán, Mexico. Detection of parasite DNA in the soil of above 50% of the  
142 houses evaluated poses a health risk for the inhabitants. Moreover, 15% of the houses assessed  
143 had soil contaminated with more than one parasite species, and up to 6 different parasite species  
144 were detected in a single home. This is the first report of parasites-DNA detected in soil samples  
145 from a rural community in Yucatán and suggests higher transmission rates of parasites with  
146 medical importance. Furthermore, an easy-to-use qPCR identified several parasites critical to  
147 decision-making for treatment and public health interventions.

148

149

150

151

152

153

154

155

156

157 **Table 1.** Proportion and percentage of samples positive to Helminths or Protozoa among the  
 158 study population.

| Number of parasites detected/sample | Helminths                                      |            | Protozoa                                       |            | Helminths or Protozoa                          |            |
|-------------------------------------|------------------------------------------------|------------|------------------------------------------------|------------|------------------------------------------------|------------|
|                                     | Proportion and percentage of positives to qPCR |            | Proportion and percentage of positives to qPCR |            | Proportion and percentage of positives to qPCR |            |
| 1                                   | 4/6                                            | 67%        | 15/19                                          | 79%        | 19/22                                          | 86%        |
| 2                                   | 1/6                                            | 17%        | 3/19                                           | 16%        | -                                              | -          |
| 3                                   | 1/6                                            | 17%        | 1/19                                           | 5%         | 2/22                                           | 9%         |
| 4                                   | -                                              | -          | -                                              | -          | -                                              | -          |
| 6                                   | -                                              | -          | -                                              | -          | 1/22                                           | 5%         |
| <b>Total positives</b>              | <b>6/34</b>                                    | <b>18%</b> | <b>19/34</b>                                   | <b>56%</b> | <b>22/34</b>                                   | <b>65%</b> |

159  
 160  
 161 **Fig. 1.** Total prevalence of parasites in all 68 samples. *Acanthamoeba* spp. had the highest DNA  
 162 concentration compared to all other parasites (Kruskal Wallis  $P < 0.0001$ ).

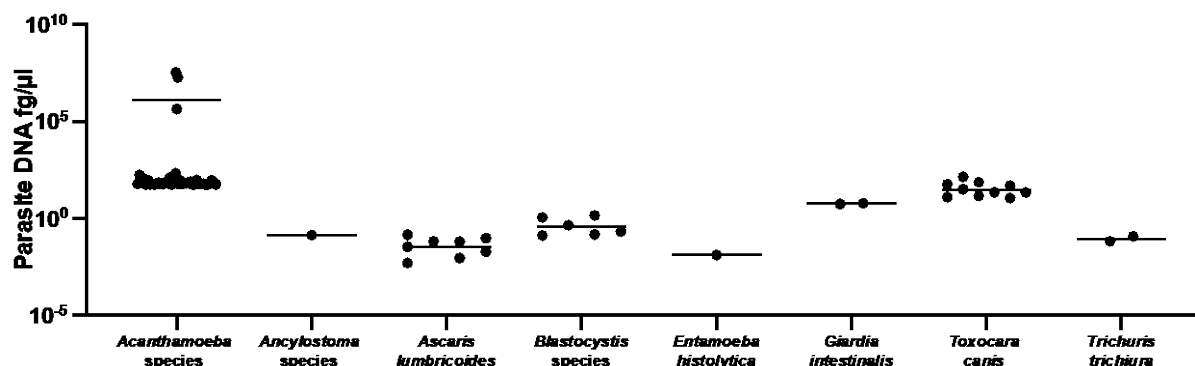

163

164



165 **Table 2.** Percentage of positives and DNA concentration measured by qPCR in the soil samples  
 166 collected.

|                                  | <b>% PCR positives</b> | <b>DNA concentration in soil<br/>(fg/μl, median (range))</b> |
|----------------------------------|------------------------|--------------------------------------------------------------|
| <i>Acanthamoeba</i> spp.         | 53%, (18/34)           | 63.3373 (<br>54.95 -<br>3447)                                |
| <i>Ascaris lumbricoides</i>      | 12%, (4/34)            | 0.035 (0.005-0.144)                                          |
| <i>Ancylostoma</i> spp.          | 3%, (1/34)             | 0.135                                                        |
| <i>Blastocystis</i> spp.         | 12%, (4/34)            | 0.331 (0.13-1.272)                                           |
| <i>Cryptosporidium</i> spp.      | 0%, (0/34)             | 0                                                            |
| <i>Entamoeba histolytica</i>     | 3%, (1/34)             | 0.013                                                        |
| <i>Giardia intestinalis</i>      | 3%, (1/34)             | 6.087                                                        |
| <i>Necator americanus</i>        | 0%, (0/34)             | 0                                                            |
| <i>Strongyloides stercoralis</i> | 0%, (0/34)             | 0                                                            |
| <i>Trichuris trichiura</i>       | 3%, (1/34)             | 0.091                                                        |
| <i>Toxocara canis</i>            | 9%, (3/34)             | 27.16689038 (<br>11.43-<br>137.245)                          |
| <i>Toxocara cati</i>             | 0%, (0/34)             | 0                                                            |

167

168

169

170 **Acknowledgments**

171 The authors would like to thank the people of Yucatán, Mexico for welcoming us into their homes.

172 **Financial Support**

173 This work was supported by the Maternal and Infant Environmental Health Riskscape (MIEHR)

174 Center of Excellence on Environmental Health Disparities Research, NIMHD grant #P50

175 MD015496.

176 **Disclosures**

177 None

178

179

180

181

182

183

184

185

186

187 **REFERENCES**

- 188 1. Soil-transmitted helminth infections. World Health Organization. Accessed May 9, 2023.  
189 <https://www.who.int/news-room/fact-sheets/detail/soil-transmitted-helminth-infections>
- 190 2. Geisen S, Mitchell EAD, Adl S, et al. Soil protists: a fertile frontier in soil biology research.  
191 *FEMS Microbiol Rev.* 2018;42(3):293-323. doi:10.1093/femsre/fuy006
- 192 3. Mejia R, Seco-Hidalgo V, Garcia-Ramon D, et al. Detection of enteric parasite DNA in  
193 household and bed dust samples: potential for infection transmission. *Parasites & vectors.*  
194 2020;13(1),141. doi.org/10.1186/s13071-020-04012-6
- 195 4. Mejia R, Vicuña Y, Broncano N, et al. A novel, multi-parallel, real-time polymerase chain  
196 reaction approach for eight gastrointestinal parasites provides improved diagnostic capabilities  
197 to resource-limited at-risk populations. *Am J Trop Med Hyg.* 2013;88(6):1041-1047.  
198 doi:10.4269/ajtmh.12-0726
- 199 5. Aykur M., and Dagci H. Evaluation of molecular characterization and phylogeny for  
200 quantification of *Acanthamoeba* and *Naegleria fowleri* in various water sources, Turkey. *PloS one.*  
201 2021;16(8),e0256659. doi.org/10.1371/journal.pone.0256659
- 202 6. Naceanceno KS, Matamoros G, Gabrie JA, et al. Use of Multi-Parallel Real-Time Quantitative  
203 PCR to Determine Blastocystis Prevalence and association with other gastrointestinal parasite  
204 infection in a rural Honduran location. *Am J Trop Med Hyg.* 2020;102(6):1373-1375.  
205 doi:10.4269/ajtmh.19-0876
- 206 7. Marciano-Cabral F, Cabral G. *Acanthamoeba* spp. as agents of disease in humans. *Clin*  
207 *Microbiol Rev.* 2003;16(2):273-307. doi:10.1128/CMR.16.2.273-307.2003
- 208 8. Rodríguez-Vivas RI, Gutierrez-Ruiz E, Bolio-González ME, et al. An epidemiological study of  
209 intestinal parasites of dogs from Yucatan, Mexico, and their risk to public health. *Vector Borne*  
210 *Zoonotic Dis.* 2011;11(8):1141-1144. doi:10.1089/vbz.2010.0232

- 211 9. Tyungu DL, McCormick D, Lau CL, et al. Toxocara species environmental contamination of  
212 public spaces in New York City. *PLoS Negl Trop Dis*. 2020;14(5):e0008249.  
213 doi:10.1371/journal.pntd.0008249
- 214 10. Panti-May JA, Zonta ML, Cociancic P, et al. Occurrence of intestinal parasites in Mayan  
215 children from Yucatán, Mexico. *Acta Trop*. 2019;195:58-61.  
216 doi:10.1016/j.actatropica.2019.04.023
- 217 11. Steinbaum L, Njenga SM, Kihara J, et al. Soil-transmitted helminth eggs are present in soil at  
218 multiple locations within households in rural Kenya. *PLoS One*. 2016;11(6):e0157780.  
219 doi:10.1371/journal.pone.0157780
- 220 12. Mbong Ngwese M, Prince Manouana G, Nguema Moure PA, et al. Diagnostic techniques of  
221 soil-transmitted helminths: Impact on control measures. *Trop Med Infect Dis*. 2020;5(2).  
222 doi:10.3390/tropicalmed5020093
- 223 13. Gandasegui J, Martínez-Valladares M, Grau-Pujol B, et al. Role of DNA-detection-based tools  
224 for monitoring the soil-transmitted helminth treatment response in drug-efficacy trials. *PLoS Negl*  
225 *Trop Dis*. 2020;14(2):e0007931. doi:10.1371/journal.pntd.0007931
- 226 14. Easton A V, Oliveira RG, O'Connell EM, et al. Multi-parallel qPCR provides increased  
227 sensitivity and diagnostic breadth for gastrointestinal parasites of humans: field-based inferences  
228 on the impact of mass deworming. *Parasit Vectors*. 2016;9:38. doi:10.1186/s13071-016-1314-y
- 229
